# Supplementary material for: Aging Remodels Mitochondrial Architecture Across the Male Reproductive Axis
Source: Research Square preprint supplement (doi:10.21203/rs.3.rs-9802113/v1), 2026-05-26
Supplement: Supplementary file 1 [file 72d6c5508df005da25431cbc.docx]

**Supplement**

**Table S1. Codes used to define male infertility.** SNOMED CT, ICD-9-CM, and ICD-10-CM codes used to identify participants with male infertility. ICD-10-CM “x” indicates inclusion of all valid subcodes; indentation denotes descendant concepts.

| **Concept Name** | **Standard/Source** | **Concept Type** | **Code** |
| --- | --- | --- | --- |
| Male infertility | Standard | SNOMED CT | 2904007 |
| Infertility due to azoospermia | Standard | SNOMED CT | 359559003 |
| Infertility due to an extratesticular cause | Standard | SNOMED CT | 84245004 |
| Infertility due to oligospermia | Standard | SNOMED CT | 71349004 |
| Primary male infertility | Standard | SNOMED CT | 236788009 |
| Congenital male infertility | Standard | SNOMED CT | 236790005 |
| Male infertility of developmental origin | Standard | SNOMED CT | 236794001 |
| Infertile male syndrome | Standard | SNOMED CT | 4107000 |
| Infertility due to testicular hypoplasia | Standard | SNOMED CT | 414494005 |
| Failure to conceive due to the infertility of male partner | Standard | SNOMED CT | 414187003 |
| Infertility, male | Source | ICD-9-CM | 606 |
| Azoospermia | Source | ICD-9-CM | 606.0 |
| Oligospermia | Source | ICD-9-CM | 606.1 |
| Infertility due to extratesticular causes | Source | ICD-9-CM | 606.8 |
| Male infertility, unspecified | Source | ICD-9-CM | 606.9 |
| Male infertility | Source | ICD-10-CM | N46 |
| Azoospermia | Source | ICD-10-CM | N46.0x |
| Oligospermia | Source | ICD-10-CM | N46.1x |
| Other male infertility | Source | ICD-10-CM | N46.8 |
| Male infertility, unspecified | Source | ICD-10-CM | N46.9 |

**Table S2: Bonferroni-significant clinical phenotypes associated with male infertility case status in age-stratified PheWAS.**

| Age Group | Group | Phecode | Phenotype | Cases | Controls | OR (95% CI) | *p*-value | Direction |
| --- | --- | --- | --- | --- | --- | --- | --- | --- |
| Young | genitourinary | 609.11 | Azoospermia and oligospermia | <20 | 2612 | 395.3 (4.1, 7.86) | 4.27E-10 | Higher in Young MI |
| Young | genitourinary | 605 | Erectile dysfunction [ED] | 56 | 2550 | 7.29 (1.33, 2.64) | 2.94E-09 | Higher in Young MI |
| Young | circulatory system | 454 | Varicose veins | 43 | 2567 | 8.01 (1.35, 2.81) | 2.37E-08 | Higher in Young MI |
| Young | musculoskeletal | 740.11 | Osteoarthrosis, localized, primary | 37 | 2560 | 7.12 (1.16, 2.76) | 1.49E-06 | Higher in Young MI |
| Young | genitourinary | 608 | Other disorders of male genital organs | 68 | 2478 | 5.16 (0.97, 2.31) | 1.52E-06 | Higher in Young MI |
| Young | neoplasms | 198 | Secondary malignant neoplasm | <20 | 2622 | 23.94 (1.8, 4.55) | 6.20E-06 | Higher in Young MI |
| Young | genitourinary | 609.2 | Abnormal spermatozoa | <20 | 2616 | 28.33 (1.88, 4.81) | 7.62E-06 | Higher in Young MI |
| Young | musculoskeletal | 740.1 | Osteoarthritis; localized | 45 | 2554 | 5.62 (0.96, 2.5) | 1.12E-05 | Higher in Young MI |
| Young | circulatory system | 452.2 | Deep vein thrombosis [DVT] | 29 | 2602 | 7.18 (1.08, 2.86) | 1.31E-05 | Higher in Young MI |
| Old | respiratory | 465 | Acute upper respiratory infections of multiple or unspecified sites | 459 | 2032 | 5.65 (1.42, 2.04) | 1.58E-28 | Higher in Old MI |
| Old | respiratory | 465.2 | Acute pharyngitis | 168 | 2421 | 8.07 (1.72, 2.46) | 3.00E-28 | Higher in Old MI |
| Old | neoplasms | 216 | Benign neoplasm of skin | 379 | 2272 | 5.67 (1.41, 2.06) | 7.00E-26 | Higher in Old MI |
| Old | injuries & poisonings | 835 | Internal derangement of knee | 131 | 2598 | 6.32 (1.44, 2.24) | 1.36E-19 | Higher in Old MI |
| Old | genitourinary | 605 | Erectile dysfunction [ED] | 505 | 2143 | 4.07 (1.1, 1.71) | 2.39E-19 | Higher in Old MI |
| Old | injuries & poisonings | 840 | Sprains and strains | 311 | 2277 | 4.3 (1.14, 1.78) | 5.13E-19 | Higher in Old MI |
| Old | dermatologic | 939 | Atopic/contact dermatitis due to other or unspecified | 312 | 2275 | 4.45 (1.16, 1.83) | 1.40E-18 | Higher in Old MI |
| Old | dermatologic | 706 | Diseases of sebaceous glands | 262 | 2333 | 4.48 (1.16, 1.84) | 1.84E-18 | Higher in Old MI |
| Old | infectious diseases | 110 | Dermatophytosis / Dermatomycosis | 367 | 2259 | 4.15 (1.1, 1.75) | 5.91E-18 | Higher in Old MI |
| Old | endocrine/metabolic | 257.1 | Testicular hypofunction | 150 | 2605 | 5.39 (1.3, 2.07) | 1.56E-17 | Higher in Old MI |
| Old | endocrine/metabolic | 257 | Testicular dysfunction | 152 | 2601 | 5.31 (1.28, 2.06) | 2.72E-17 | Higher in Old MI |
| Old | musculoskeletal | 745 | Pain in joint | 1252 | 1281 | 4.3 (1.12, 1.8) | 6.35E-17 | Higher in Old MI |
| Old | infectious diseases | 110.1 | Dermatophytosis | 344 | 2288 | 3.94 (1.05, 1.7) | 1.49E-16 | Higher in Old MI |
| Old | neoplasms | 208 | Benign neoplasm of colon | 513 | 2093 | 3.57 (0.97, 1.58) | 1.77E-16 | Higher in Old MI |
| Old | musculoskeletal | 726 | Peripheral enthesopathies and allied syndromes | 588 | 1997 | 3.14 (0.85, 1.44) | 2.14E-14 | Higher in Old MI |
| Old | dermatologic | 701 | Other hypertrophic and atrophic conditions of skin | 207 | 2399 | 4.11 (1.04, 1.78) | 7.23E-14 | Higher in Old MI |
| Old | respiratory | 464 | Acute sinusitis | 172 | 2473 | 4.36 (1.09, 1.86) | 7.89E-14 | Higher in Old MI |
| Old | injuries & poisonings | 871 | Open wounds of extremities | 219 | 2405 | 4.0 (1.02, 1.75) | 8.93E-14 | Higher in Old MI |
| Old | dermatologic | 702.2 | Seborrheic keratosis | 332 | 2321 | 3.74 (0.97, 1.66) | 8.99E-14 | Higher in Old MI |
| Old | dermatologic | 702 | Degenerative skin conditions and other dermatoses | 415 | 2226 | 3.57 (0.94, 1.61) | 1.20E-13 | Higher in Old MI |
| Old | symptoms | 760 | Back pain | 779 | 1725 | 3.04 (0.82, 1.41) | 1.87E-13 | Higher in Old MI |
| Old | genitourinary | 601 | Inflammatory diseases of prostate | 129 | 2579 | 4.85 (1.15, 2.01) | 5.58E-13 | Higher in Old MI |
| Old | genitourinary | 608 | Other disorders of male genital organs | 129 | 2560 | 4.73 (1.13, 1.98) | 6.62E-13 | Higher in Old MI |
| Old | dermatologic | 687.1 | Rash and other nonspecific skin eruption | 249 | 2341 | 3.64 (0.94, 1.65) | 9.16E-13 | Higher in Old MI |
| Old | dermatologic | 704 | Diseases of hair and hair follicles | 132 | 2570 | 4.61 (1.11, 1.95) | 1.06E-12 | Higher in Old MI |
| Old | respiratory | 512 | Other symptoms of respiratory system | 1078 | 1394 | 2.99 (0.79, 1.4) | 1.76E-12 | Higher in Old MI |
| Old | injuries & poisonings | 871.2 | Open wound of finger(s) | 67 | 2641 | 6.61 (1.35, 2.42) | 4.65E-12 | Higher in Old MI |
| Old | musculoskeletal | 740 | Osteoarthrosis | 784 | 1755 | 2.88 (0.76, 1.36) | 7.04E-12 | Higher in Old MI |
| Old | respiratory | 512.8 | Cough | 510 | 1964 | 2.83 (0.74, 1.34) | 1.49E-11 | Higher in Old MI |
| Old | circulatory system | 454 | Varicose veins | 139 | 2580 | 4.09 (1.0, 1.82) | 1.90E-11 | Higher in Old MI |
| Old | musculoskeletal | 726.1 | Enthesopathy | 273 | 2359 | 3.24 (0.83, 1.52) | 1.98E-11 | Higher in Old MI |
| Old | circulatory system | 427.9 | Palpitations | 221 | 2444 | 3.38 (0.85, 1.58) | 6.38E-11 | Higher in Old MI |
| Old | musculoskeletal | 740.9 | Osteoarthrosis NOS | 380 | 2214 | 2.94 (0.75, 1.41) | 1.42E-10 | Higher in Old MI |
| Old | mental disorders | 300 | Anxiety disorders | 661 | 1960 | 2.5 (0.64, 1.2) | 1.54E-10 | Higher in Old MI |
| Old | sense organs | 371.3 | Inflammation of eyelids | 145 | 2581 | 3.9 (0.94, 1.78) | 2.07E-10 | Higher in Old MI |
| Old | sense organs | 369 | Infection of the eye | 99 | 2562 | 4.78 (1.08, 2.05) | 2.11E-10 | Higher in Old MI |
| Old | injuries & poisonings | 830 | Dislocation | 143 | 2572 | 3.84 (0.93, 1.76) | 2.20E-10 | Higher in Old MI |
| Old | respiratory | 512.9 | Other dyspnea | 537 | 2027 | 2.63 (0.67, 1.27) | 2.92E-10 | Higher in Old MI |
| Old | respiratory | 476 | Allergic rhinitis | 332 | 2292 | 2.85 (0.72, 1.38) | 4.10E-10 | Higher in Old MI |
| Old | mental disorders | 302 | Sexual and gender identity disorders | 88 | 2651 | 4.78 (1.07, 2.06) | 4.45E-10 | Higher in Old MI |
| Old | sense organs | 381 | Otitis media and Eustachian tube disorders | 130 | 2552 | 4.0 (0.95, 1.82) | 4.72E-10 | Higher in Old MI |
| Old | sense organs | 371 | Inflammation of the eye | 188 | 2516 | 3.45 (0.85, 1.63) | 4.98E-10 | Higher in Old MI |
| Old | mental disorders | 304 | Adjustment reaction | 214 | 2478 | 3.23 (0.8, 1.54) | 6.51E-10 | Higher in Old MI |
| Old | symptoms | 785 | Abdominal pain | 790 | 1723 | 2.47 (0.62, 1.19) | 6.65E-10 | Higher in Old MI |
| Old | mental disorders | 300.1 | Anxiety disorder | 561 | 2071 | 2.48 (0.62, 1.2) | 7.40E-10 | Higher in Old MI |
| Old | infectious diseases | 110.12 | Althete's foot | 110 | 2612 | 4.63 (1.04, 2.02) | 7.71E-10 | Higher in Old MI |
| Old | genitourinary | 599 | Other symptoms/disorders or the urinary system | 568 | 2009 | 2.61 (0.65, 1.26) | 9.63E-10 | Higher in Old MI |
| Old | dermatologic | 687.4 | Disturbance of skin sensation | 353 | 2229 | 2.77 (0.69, 1.34) | 1.06E-09 | Higher in Old MI |
| Old | injuries & poisonings | 916 | Contusion | 166 | 2440 | 3.52 (0.85, 1.66) | 1.23E-09 | Higher in Old MI |
| Old | dermatologic | 706.2 | Sebaceous cyst | 145 | 2540 | 3.6 (0.87, 1.7) | 1.49E-09 | Higher in Old MI |
| Old | musculoskeletal | 727 | Other disorders of synovium, tendon, and bursa | 322 | 2284 | 2.85 (0.71, 1.39) | 1.57E-09 | Higher in Old MI |
| Old | dermatologic | 706.8 | Other specified diseases of sebaceous glands | 86 | 2591 | 4.89 (1.07, 2.11) | 2.02E-09 | Higher in Old MI |
| Old | genitourinary | 601.1 | Prostatitis | 58 | 2700 | 5.9 (1.19, 2.36) | 2.35E-09 | Higher in Old MI |
| Old | dermatologic | 689 | Disorder of skin and subcutaneous tissue NOS | 221 | 2354 | 3.2 (0.78, 1.55) | 2.78E-09 | Higher in Old MI |
| Old | sense organs | 381.1 | Otitis media | 98 | 2611 | 4.33 (0.98, 1.95) | 2.79E-09 | Higher in Old MI |
| Old | injuries & poisonings | 840.3 | Joint/ligament sprain | 39 | 2716 | 7.43 (1.34, 2.67) | 3.10E-09 | Higher in Old MI |
| Old | neoplasms | 214 | Lipoma | 71 | 2662 | 5.17 (1.1, 2.19) | 3.35E-09 | Higher in Old MI |
| Old | respiratory | 475 | Chronic sinusitis | 210 | 2447 | 3.12 (0.76, 1.52) | 3.55E-09 | Higher in Old MI |
| Old | digestive | 530.11 | GERD | 734 | 1851 | 2.33 (0.56, 1.13) | 5.21E-09 | Higher in Old MI |
| Old | infectious diseases | 78 | Viral warts & HPV | 141 | 2570 | 3.51 (0.84, 1.68) | 5.22E-09 | Higher in Old MI |
| Old | sense organs | 369.5 | Conjunctivitis, infectious | 85 | 2591 | 4.63 (1.01, 2.05) | 6.34E-09 | Higher in Old MI |
| Old | digestive | 530.1 | Esophagitis, GERD and related diseases | 781 | 1813 | 2.31 (0.55, 1.12) | 6.91E-09 | Higher in Old MI |
| Old | mental disorders | 300.4 | Dysthymic disorder | 105 | 2647 | 3.92 (0.9, 1.83) | 9.08E-09 | Higher in Old MI |
| Old | digestive | 530 | Diseases of esophagus | 810 | 1780 | 2.29 (0.55, 1.11) | 9.11E-09 | Higher in Old MI |
| Old | respiratory | 483 | Acute bronchitis and bronchiolitis | 151 | 2465 | 3.48 (0.82, 1.67) | 9.96E-09 | Higher in Old MI |
| Old | sense organs | 367 | Disorders of refraction and accommodation; blindness and low vision | 379 | 2306 | 2.57 (0.62, 1.27) | 1.29E-08 | Higher in Old MI |
| Old | injuries & poisonings | 841 | Sprains and strains of back and neck | 68 | 2637 | 5.02 (1.06, 2.17) | 1.30E-08 | Higher in Old MI |
| Old | circulatory system | 418 | Nonspecific chest pain | 777 | 1733 | 2.32 (0.55, 1.13) | 1.39E-08 | Higher in Old MI |
| Old | dermatologic | 694 | Dyschromia and Vitiligo | 199 | 2468 | 3.06 (0.73, 1.5) | 1.39E-08 | Higher in Old MI |
| Old | sense organs | 367.2 | Astigmatism | 176 | 2518 | 3.17 (0.75, 1.55) | 1.59E-08 | Higher in Old MI |
| Old | respiratory | 479 | Other upper respiratory disease | 189 | 2404 | 3.09 (0.74, 1.52) | 1.79E-08 | Higher in Old MI |
| Old | neurological | 327 | Sleep disorders | 515 | 2074 | 2.37 (0.56, 1.16) | 1.86E-08 | Higher in Old MI |
| Old | dermatologic | 694.2 | Other dyschromia | 192 | 2483 | 3.05 (0.72, 1.5) | 2.11E-08 | Higher in Old MI |
| Old | sense organs | 365 | Glaucoma | 250 | 2494 | 2.86 (0.68, 1.43) | 3.79E-08 | Higher in Old MI |
| Old | infectious diseases | 110.11 | Dermatophytosis of nail | 219 | 2461 | 2.97 (0.7, 1.48) | 3.89E-08 | Higher in Old MI |
| Old | respiratory | 472 | Chronic pharyngitis and nasopharyngitis | 105 | 2616 | 3.83 (0.86, 1.82) | 4.10E-08 | Higher in Old MI |
| Old | musculoskeletal | 728.7 | Fasciitis | 150 | 2557 | 3.33 (0.77, 1.63) | 4.25E-08 | Higher in Old MI |
| Old | sense organs | 389 | Hearing loss | 458 | 2209 | 2.43 (0.57, 1.2) | 4.40E-08 | Higher in Old MI |
| Old | respiratory | 470 | Septal Deviations/Turbinate Hypertrophy | 116 | 2628 | 3.56 (0.81, 1.73) | 5.34E-08 | Higher in Old MI |
| Old | sense organs | 366 | Cataract | 467 | 2186 | 2.52 (0.59, 1.26) | 6.19E-08 | Higher in Old MI |
| Old | injuries & poisonings | 804 | Fracture of hand or wrist | 71 | 2675 | 4.43 (0.95, 2.03) | 7.19E-08 | Higher in Old MI |
| Old | dermatologic | 938.2 | Chronic dermatitis due to solar radiation | 86 | 2655 | 4.01 (0.88, 1.9) | 9.24E-08 | Higher in Old MI |
| Old | circulatory system | 455 | Hemorrhoids | 328 | 2159 | 2.6 (0.6, 1.31) | 1.06E-07 | Higher in Old MI |
| Old | digestive | 578 | Gastrointestinal hemorrhage | 257 | 2378 | 2.77 (0.64, 1.4) | 1.21E-07 | Higher in Old MI |
| Old | neurological | 338 | Pain | 815 | 1662 | 2.15 (0.48, 1.05) | 1.33E-07 | Higher in Old MI |
| Old | sense organs | 386.9 | Dizziness and giddiness (Light-headedness and vertigo) | 367 | 2191 | 2.5 (0.57, 1.26) | 1.49E-07 | Higher in Old MI |
| Old | dermatologic | 938 | Dermatitis due to solar radiation | 107 | 2631 | 3.53 (0.79, 1.74) | 1.66E-07 | Higher in Old MI |
| Old | dermatologic | 703.1 | Ingrowing nail | 66 | 2687 | 4.72 (0.97, 2.14) | 1.97E-07 | Higher in Old MI |
| Old | digestive | 550.1 | Inguinal hernia | 173 | 2539 | 2.92 (0.67, 1.48) | 2.11E-07 | Higher in Old MI |
| Old | sense organs | 389.1 | Sensorineural hearing loss | 248 | 2443 | 2.71 (0.62, 1.38) | 2.12E-07 | Higher in Old MI |
| Old | musculoskeletal | 740.1 | Osteoarthritis; localized | 618 | 1936 | 2.26 (0.51, 1.13) | 2.51E-07 | Higher in Old MI |
| Old | respiratory | 497 | Bronchitis | 114 | 2560 | 3.48 (0.77, 1.72) | 2.57E-07 | Higher in Old MI |
| Old | neurological | 327.32 | Obstructive sleep apnea | 584 | 2094 | 2.16 (0.48, 1.07) | 2.66E-07 | Higher in Old MI |
| Old | musculoskeletal | 742 | Derangement of joint, non-traumatic | 75 | 2661 | 4.05 (0.86, 1.94) | 3.42E-07 | Higher in Old MI |
| Old | infectious diseases | 79 | Viral infection | 152 | 2463 | 3.13 (0.7, 1.58) | 4.76E-07 | Higher in Old MI |
| Old | digestive | 578.2 | Blood in stool | 105 | 2580 | 3.62 (0.78, 1.79) | 5.18E-07 | Higher in Old MI |
| Old | mental disorders | 291.8 | Alteration of consciousness | 52 | 2681 | 4.94 (0.97, 2.22) | 5.18E-07 | Higher in Old MI |
| Old | genitourinary | 601.3 | Orchitis and epididymitis | 42 | 2723 | 6.0 (1.09, 2.49) | 5.28E-07 | Higher in Old MI |
| Old | musculoskeletal | 735 | Acquired foot deformities | 231 | 2481 | 2.63 (0.59, 1.34) | 5.64E-07 | Higher in Old MI |
| Old | neurological | 327.3 | Sleep apnea | 666 | 2008 | 2.08 (0.45, 1.02) | 5.81E-07 | Higher in Old MI |
| Old | musculoskeletal | 740.11 | Osteoarthrosis, localized, primary | 574 | 1981 | 2.19 (0.48, 1.1) | 7.21E-07 | Higher in Old MI |
| Old | injuries & poisonings | 801 | Fracture of ankle and foot | 105 | 2634 | 3.41 (0.74, 1.71) | 8.46E-07 | Higher in Old MI |
| Old | musculoskeletal | 742.9 | Other derangement of joint | 61 | 2689 | 4.29 (0.87, 2.04) | 9.61E-07 | Higher in Old MI |
| Old | dermatologic | 696.41 | Psoriasis vulgaris | 75 | 2699 | 3.8 (0.8, 1.87) | 9.73E-07 | Higher in Old MI |
| Old | symptoms | 761 | Cervicalgia | 328 | 2264 | 2.36 (0.52, 1.21) | 1.01E-06 | Higher in Old MI |
| Old | neoplasms | 214.1 | Lipoma of skin and subcutaneous tissue | 45 | 2714 | 5.25 (0.99, 2.33) | 1.10E-06 | Higher in Old MI |
| Old | symptoms | 798 | Malaise and fatigue | 617 | 1878 | 2.14 (0.46, 1.07) | 1.13E-06 | Higher in Old MI |
| Old | circulatory system | 427.61 | Supraventricular premature beats | 22 | 2732 | 8.83 (1.29, 3.06) | 1.44E-06 | Higher in Old MI |
| Old | digestive | 532 | Dysphagia | 212 | 2478 | 2.58 (0.56, 1.34) | 1.96E-06 | Higher in Old MI |
| Old | symptoms | 783 | Fever of unknown origin | 192 | 2397 | 2.66 (0.57, 1.38) | 2.03E-06 | Higher in Old MI |
| Old | dermatologic | 690.1 | Seborrheic dermatitis | 99 | 2628 | 3.35 (0.71, 1.71) | 2.15E-06 | Higher in Old MI |
| Old | dermatologic | 690 | Erythematosquamous dermatosis | 99 | 2626 | 3.35 (0.71, 1.71) | 2.20E-06 | Higher in Old MI |
| Old | dermatologic | 701.2 | Scar conditions and fibrosis of skin | 64 | 2657 | 4.01 (0.81, 1.96) | 2.35E-06 | Higher in Old MI |
| Old | mental disorders | 293.1 | Swelling, mass, or lump in head and neck [Space-occupying lesion, intracranial NOS] | 85 | 2617 | 3.66 (0.76, 1.84) | 2.37E-06 | Higher in Old MI |
| Old | dermatologic | 704.1 | Alopecia | 33 | 2750 | 6.14 (1.06, 2.57) | 2.42E-06 | Higher in Old MI |
| Old | sense organs | 367.1 | Myopia | 143 | 2582 | 2.83 (0.61, 1.47) | 2.51E-06 | Higher in Old MI |
| Old | neurological | 338.1 | Acute pain | 272 | 2266 | 2.41 (0.51, 1.25) | 2.81E-06 | Higher in Old MI |
| Old | circulatory system | 427 | Cardiac dysrhythmias | 736 | 1790 | 2.02 (0.41, 1.0) | 3.12E-06 | Higher in Old MI |
| Old | musculoskeletal | 726.3 | Bursitis | 101 | 2643 | 3.2 (0.67, 1.65) | 3.21E-06 | Higher in Old MI |
| Old | digestive | 528.1 | Stomatitis and mucositis | 25 | 2747 | 6.99 (1.12, 2.76) | 3.39E-06 | Higher in Old MI |
| Old | mental disorders | 300.11 | Generalized anxiety disorder | 150 | 2581 | 2.73 (0.57, 1.43) | 4.55E-06 | Higher in Old MI |
| Old | dermatologic | 696 | Psoriasis and related disorders | 82 | 2691 | 3.41 (0.7, 1.75) | 4.69E-06 | Higher in Old MI |
| Old | dermatologic | 696.4 | Psoriasis | 81 | 2695 | 3.41 (0.7, 1.75) | 5.08E-06 | Higher in Old MI |
| Old | musculoskeletal | 735.3 | Hallux valgus (Bunion) | 59 | 2704 | 4.62 (0.87, 2.19) | 5.63E-06 | Higher in Old MI |
| Old | digestive | 536.8 | Dyspepsia and other specified disorders of function of stomach | 42 | 2691 | 4.97 (0.91, 2.3) | 5.67E-06 | Higher in Old MI |
| Old | digestive | 528 | Diseases of the oral soft tissues, excluding lesions specific for gingiva and tongue | 81 | 2633 | 3.42 (0.7, 1.76) | 6.57E-06 | Higher in Old MI |
| Old | neurological | 351 | Other peripheral nerve disorders | 279 | 2385 | 2.32 (0.47, 1.2) | 6.64E-06 | Higher in Old MI |
| Old | endocrine/metabolic | 272 | Disorders of lipoid metabolism | 1481 | 1146 | 2.11 (0.42, 1.07) | 7.22E-06 | Higher in Old MI |
| Old | musculoskeletal | 735.1 | Flat foot | 59 | 2721 | 4.01 (0.78, 2.0) | 7.31E-06 | Higher in Old MI |
| Old | mental disorders | 291 | Other specified nonpsychotic and/or transient mental disorders | 66 | 2652 | 3.78 (0.74, 1.92) | 8.33E-06 | Higher in Old MI |
| Old | infectious diseases | 8 | Intestinal infection | 80 | 2646 | 3.52 (0.71, 1.81) | 8.38E-06 | Higher in Old MI |
| Old | neoplasms | 185 | Cancer of prostate | 172 | 2608 | 2.73 (0.56, 1.44) | 8.81E-06 | Higher in Old MI |
| Old | endocrine/metabolic | 278.1 | Obesity | 666 | 1943 | 1.92 (0.36, 0.94) | 1.01E-05 | Higher in Old MI |
| Old | circulatory system | 426 | Cardiac conduction disorders | 347 | 2223 | 2.21 (0.44, 1.14) | 1.11E-05 | Higher in Old MI |
| Old | sense organs | 366.2 | Senile cataract | 398 | 2270 | 2.2 (0.44, 1.14) | 1.16E-05 | Higher in Old MI |
| Old | endocrine/metabolic | 272.1 | Hyperlipidemia | 1476 | 1152 | 2.06 (0.4, 1.04) | 1.22E-05 | Higher in Old MI |
| Old | musculoskeletal | 741 | Symptoms and disorders of the joints | 348 | 2227 | 2.16 (0.42, 1.12) | 1.26E-05 | Higher in Old MI |
| Old | endocrine/metabolic | 272.11 | Hypercholesterolemia | 506 | 2108 | 2.0 (0.38, 1.0) | 1.37E-05 | Higher in Old MI |
| Old | infectious diseases | 110.13 | Dermatophytosis of the body | 46 | 2695 | 4.32 (0.8, 2.12) | 1.39E-05 | Higher in Old MI |
| Old | endocrine/metabolic | 250.4 | Abnormal glucose | 477 | 2080 | 2.02 (0.39, 1.02) | 1.46E-05 | Higher in Old MI |
| Old | genitourinary | 599.3 | Dysuria | 134 | 2546 | 2.79 (0.56, 1.49) | 1.64E-05 | Higher in Old MI |
| Old | dermatologic | 695 | Erythematous conditions | 154 | 2538 | 2.62 (0.52, 1.4) | 2.02E-05 | Higher in Old MI |
| Old | endocrine/metabolic | 278 | Overweight, obesity and other hyperalimentation | 675 | 1932 | 1.87 (0.34, 0.92) | 2.26E-05 | Higher in Old MI |
| Old | genitourinary | 593 | Hematuria | 207 | 2461 | 2.39 (0.47, 1.28) | 2.29E-05 | Higher in Old MI |
| Old | dermatologic | 681 | Superficial cellulitis and abscess | 397 | 2209 | 2.04 (0.38, 1.05) | 2.56E-05 | Higher in Old MI |
| Old | infectious diseases | 54 | Herpes simplex | 53 | 2710 | 3.96 (0.73, 2.02) | 2.69E-05 | Higher in Old MI |
| Old | dermatologic | 703 | Diseases of nail, NOS | 107 | 2622 | 2.95 (0.58, 1.59) | 2.71E-05 | Higher in Old MI |
| Old | musculoskeletal | 722.1 | Displacement of intervertebral disc | 167 | 2524 | 2.46 (0.48, 1.32) | 3.11E-05 | Higher in Old MI |
| Old | musculoskeletal | 722 | Intervertebral disc disorders | 399 | 2231 | 2.01 (0.37, 1.03) | 3.15E-05 | Higher in Old MI |
| Old | symptoms | 790.6 | Other abnormal blood chemistry | 373 | 2191 | 2.04 (0.38, 1.05) | 3.45E-05 | Higher in Old MI |

Each row represents a phecode associated with male infertility (MI) case status in the age-stratified clinical PheWAS. Male infertility case status was modeled as the independent variable in covariate-adjusted logistic regression, with adjustment for age at last EHR event, sex at birth, and the first ten genetic principal components. Reported values include phecode group, phecode, phenotype label, number of cases and controls with the phenotype, odds ratio with 95% confidence interval (CI), nominal *p* value (*p* < 0.05), and direction of association. Bonferroni significance was defined as *p* < 5.41 × 10-5 for the young cohort and *p* < 4.07 × 10-5 for the older cohort.

**Table S3: Bonferroni- and nominally significant laboratory phenotypes associated with male infertility in age-stratified clinical LabWAS.**

| Age Group | Group | Laboratory Phenotype | Cases | Controls | Beta (SE) | *p*-value | Significance | Direction |
| --- | --- | --- | --- | --- | --- | --- | --- | --- |
| Young | liver | Albumin | 78 | 1323 | 0.268 (0.093) | 3.87E-03 | Nominal | Higher in Young MI |
| Young | blood | Platelet mean volume [Entitic volume] in Blood by Rees-Ecker | 42 | 253 | 0.416 (0.148) | 5.00E-03 | Nominal | Higher in Young MI |
| Young | blood | Band form neutrophils/100 leukocytes in Blood | <20 | 57 | -1.086 (0.446) | 1.50E-02 | Nominal | Lower in Young MI |
| Young | metabolic | Carbon dioxide, total | 87 | 1455 | 0.222 (0.098) | 2.32E-02 | Nominal | Higher in Young MI |
| Young | metabolic | Calcium | 92 | 1585 | 0.208 (0.094) | 2.64E-02 | Nominal | Higher in Young MI |
| Young | blood | Erythrocyte distribution width [Entitic volume] | <20 | 454 | 0.763 (0.361) | 3.45E-02 | Nominal | Higher in Young MI |
| Young | cardiovascular | Troponin T.cardiac by High sensitivity method | <20 | 47 | -0.516 (0.245) | 3.47E-02 | Nominal | Lower in Young MI |
| Young | blood | Myelocytes/100 leukocytes in Blood by Manual count | <20 | 61 | 1.027 (0.492) | 3.67E-02 | Nominal | Higher in Young MI |
| Young | liver | Calcium [Mass/volume] corrected for albumin in Serum or Plasma | <20 | 84 | 0.497 (0.244) | 4.20E-02 | Nominal | Higher in Young MI |
| Old | cardiovascular | INR in Blood | 22 | 106 | -1.009 (0.182) | 2.98E-08 | Bonferroni | Lower in Old MI |
| Old | metabolic | Carbon dioxide, total | 207 | 1719 | 0.351 (0.066) | 1.06E-07 | Bonferroni | Higher in Old MI |
| Old | liver | Albumin | 201 | 1661 | 0.377 (0.071) | 1.30E-07 | Bonferroni | Higher in Old MI |
| Old | blood | Erythrocyte distribution width [Entitic volume] | <20 | 330 | -1.290 (0.248) | 1.86E-07 | Bonferroni | Lower in Old MI |
| Old | blood | Hemoglobin | 212 | 1912 | 0.324 (0.068) | 1.81E-06 | Bonferroni | Higher in Old MI |
| Old | cardiovascular | Natriuretic peptide B | 26 | 436 | -0.736 (0.192) | 1.26E-04 | Bonferroni | Lower in Old MI |
| Old | blood | Erythrocytes | 191 | 1370 | 0.278 (0.075) | 2.09E-04 | Bonferroni | Higher in Old MI |
| Old | blood | Hematocrit [Volume Fraction] of Blood | 206 | 1952 | 0.233 (0.068) | 6.08E-04 | Nominal | Higher in Old MI |
| Old | metabolic | Glucose | 217 | 1942 | -0.217 (0.066) | 9.12E-04 | Nominal | Lower in Old MI |
| Old | other | Iron binding capacity | 67 | 460 | -0.355 (0.109) | 1.09E-03 | Nominal | Lower in Old MI |
| Old | blood | Platelet mean volume [Entitic volume] in Blood by Rees-Ecker | 99 | 366 | 0.342 (0.107) | 1.40E-03 | Nominal | Higher in Old MI |
| Old | blood | Hemoglobin A1c/Hemoglobin.total in Blood by HPLC | 22 | 354 | -0.626 (0.199) | 1.63E-03 | Nominal | Lower in Old MI |
| Old | metabolic | Cholesterol in LDL | 198 | 1334 | 0.186 (0.071) | 8.86E-03 | Nominal | Higher in Old MI |
| Old | blood | Monocytes/100 leukocytes in Blood | 184 | 1633 | -0.197 (0.077) | 1.02E-02 | Nominal | Lower in Old MI |
| Old | liver | Alkaline phosphatase | 181 | 1500 | -0.192 (0.078) | 1.36E-02 | Nominal | Lower in Old MI |
| Old | metabolic | Cholesterol | 214 | 1461 | 0.162 (0.067) | 1.58E-02 | Nominal | Higher in Old MI |
| Old | cardiovascular | Troponin T.cardiac | 29 | 247 | -0.409 (0.171) | 1.69E-02 | Nominal | Lower in Old MI |
| Old | blood | MCHC [Mass/volume] | 129 | 1812 | 0.198 (0.084) | 1.79E-02 | Nominal | Higher in Old MI |
| Old | blood | Glucose mean value Estimated from glycated hemoglobin | 78 | 451 | -0.287 (0.124) | 2.03E-02 | Nominal | Lower in Old MI |
| Old | metabolic | Cholesterol non HDL | 123 | 746 | 0.198 (0.086) | 2.16E-02 | Nominal | Higher in Old MI |
| Old | cardiovascular | Troponin I.cardiac by Detection limit <= 0.01 ng/mL | <20 | 105 | 1.251 (0.554) | 2.39E-02 | Nominal | Higher in Old MI |
| Old | cardiovascular | aPTT in Blood | 77 | 198 | -0.326 (0.144) | 2.39E-02 | Nominal | Lower in Old MI |
| Old | blood | Band form neutrophils/100 leukocytes in Blood by Manual count | 32 | 151 | -0.437 (0.198) | 2.74E-02 | Nominal | Lower in Old MI |
| Old | blood | Hemoglobin A1c/Hemoglobin.total in Blood | 148 | 1015 | -0.178 (0.081) | 2.83E-02 | Nominal | Lower in Old MI |
| Old | blood | Basophils | 92 | 949 | -0.199 (0.095) | 3.55E-02 | Nominal | Lower in Old MI |
| Old | blood | Fibrin D-dimer FEU [Mass/volume] in Platelet poor plasma | 20 | 130 | -0.527 (0.257) | 4.03E-02 | Nominal | Lower in Old MI |
| Old | blood | Erythrocyte sedimentation rate | 39 | 229 | -0.325 (0.160) | 4.29E-02 | Nominal | Lower in Old MI |

Each row represents a harmonized laboratory phenotype associated with male infertility (MI) case status in the young or older age-stratified clinical LabWAS. Male infertility case status was modeled as the independent variable of interest in covariate-adjusted linear regression, with adjustment for age at last EHR event, sex at birth, and the first ten genetic principal components. Laboratory phenotypes were harmonized across related measurement concepts, grouped into laboratory domains, summarized at the participant level using median values, and rank-based inverse normal transformed before testing. Cases and controls indicate the number of MI cases and non-MI controls with the corresponding laboratory phenotype available for analysis. Reported values include age group, laboratory group, laboratory phenotype, number of cases and controls with available measurements, beta coefficient with standard error, nominal *p* value, significance category, and direction of association. Nominal significance was defined as *p* < 0.05, and Bonferroni significance was defined separately within each age-stratified LabWAS as *p* < 5.05 × 10⁻⁴ for the young cohort and *p* < 2.75 × 10⁻⁴ for the older cohort.

**Table S4. Targeted nominal GWAS variants associated with male infertility in age-stratified analyses, collapsed to the top signal per target gene and age stratum.**

| Variation ID | Age Group | Chr | Position | rsID | Ref | Alt | Beta (*β*) | SE | *p*-value | Overlapped Gene | Matched Target |
| --- | --- | --- | --- | --- | --- | --- | --- | --- | --- | --- | --- |
| chr1:211740811:A/G:1 | Old | chr1 | 2.12E+08 | rs72747041 | A | G | 0.43258 | 0.113715 | 0.000142 |  | LPGAT1 |
| chr20:723727:T/C:1 | Old | chr20 | 723727 | rs6085590 | T | C | -0.33491 | 0.09105 | 0.000235 |  | SLC52A3 |
| chr12:120417952:A/G:1 | Old | chr12 | 1.2E+08 | rs1794740 | A | G | -2.056 | 0.572638 | 0.00033 |  | COX6A1 |
| chr6:136841413:A/G:1 | Old | chr6 | 1.37E+08 | rs73567976 | A | G | -1.7297 | 0.481794 | 0.000331 | PEX7 | PEX7 |
| chr2:227358345:C/T:1 | Old | chr2 | 2.27E+08 | rs148839567 | C | T | -0.58292 | 0.162399 | 0.000331 | MFF | MFF |
| chr2:26289125:C/A:1 | Old | chr2 | 26289125 | rs183358313 | C | A | 0.93237 | 0.262426 | 0.000381 | HADHB | HADHB |
| chr4:184817650:C/G:1 | Old | chr4 | 1.85E+08 | rs28728235 | C | G | -2.8119 | 0.813694 | 0.000549 | ACSL1, ENSG00000251139 | ACSL1 |
| chr2:44521326:T/G:1 | Old | chr2 | 44521326 | rs149709220 | T | G | 1.1653 | 0.352781 | 0.000956 | CAMKMT | CAMKMT |
| chr5:179693588:C/T:1 | Old | chr5 | 1.8E+08 | rs5029247 | C | T | 0.47031 | 0.142479 | 0.000964 | ENSG00000250999, CANX, ENSG00000293215 | CANX |
| chr11:75765150:C/T:1 | Old | chr11 | 75765150 | rs10899116 | C | T | -0.47848 | 0.14666 | 0.001105 | ENSG00000300258, DGAT2-DT,DGAT2 | DGAT2 |
| chr1:93895706:A/T:1 | Old | chr1 | 93895706 | rs76729053 | A | T | 1.2329 | 0.378486 | 0.001124 | ENSG00000310419, GCLM | GCLM |
| chr1:20644971:C/T:1 | Old | chr1 | 20644971 | rs10799656 | C | T | 0.29829 | 0.092975 | 0.001335 | PINK1, PINK1-AS | PINK1 |
| chr1:165440771:A/G:1 | Old | chr1 | 1.65E+08 | rs112332240 | A | G | 0.55212 | 0.172529 | 0.001373 | RXRG | RXRG |
| chr11:86603537:C/T:1 | Old | chr11 | 86603537 | rs9667489 | C | T | 0.30248 | 0.097642 | 0.001949 | ENSG00000254733, ME3 | ME3 |
| chr12:94941525:C/A:1 | Old | chr12 | 94941525 | rs1648429 | C | A | 0.25357 | 0.081918 | 0.001965 | NDUFA12 | NDUFA12 |
| chr6:53600590:G/T:1 | Old | chr6 | 53600590 | rs77752964 | G | T | 0.40383 | 0.131371 | 0.002112 | GCLC, KILH | GCLC |
| chr1:236890362:T/C:1 | Old | chr1 | 2.37E+08 | rs3768154 | T | C | -0.89076 | 0.293013 | 0.002366 | MTR | MTR |
| chr8:76971018:G/A:1 | Old | chr8 | 76971018 | rs115814233 | G | A | 1.0872 | 0.358163 | 0.002402 |  | PEX2 |
| chr11:67606939:G/A:1 | Old | chr11 | 67606939 | rs73490568 | G | A | 0.86404 | 0.2864 | 0.002554 | NDUFV1 | NDUFV1 |
| chr18:9964908:T/C:1 | Old | chr18 | 9964908 | rs116164016 | T | C | -2.5654 | 0.853948 | 0.002663 |  | VAPA |
| chr21:42237679:C/G:1 | Old | chr21 | 42237679 | rs12483381 | C | G | 0.48191 | 0.161228 | 0.002799 | ABCG1 | ABCG1 |
| chr16:56924889:A/C:1 | Old | chr16 | 56924889 | rs863706 | A | C | 0.26241 | 0.088046 | 0.002879 |  | HERPUD1 |
| chr19:10479859:G/T:1 | Old | chr19 | 10479859 | rs118171875 | G | T | 0.60608 | 0.203384 | 0.002883 |  | KEAP1 |
| chr2:177313900:A/G:1 | Old | chr2 | 1.77E+08 | rs16865148 | A | G | -2.5597 | 0.871236 | 0.003303 | NFE2L2, ENSG00000213963 | NFE2L2 |
| chr18:9123810:A/C:1 | Old | chr18 | 9123810 | rs116959845 | A | C | 0.70856 | 0.241514 | 0.003348 | NDUFV2, ENSG00000265257, NDUFV2-AS1 | NDUFV2 |
| chr9:128334340:C/T:1 | Old | chr9 | 1.28E+08 | rs139440477 | C | T | 0.46191 | 0.157619 | 0.003384 |  | SLC27A4 |
| chr19:11103799:T/G:1 | Old | chr19 | 11103799 | rs74257940 | T | G | 0.6579 | 0.224499 | 0.003384 | LDLR | LDLR |
| chr22:41860084:T/C:1 | Old | chr22 | 41860084 | rs80720 | T | C | -0.33859 | 0.115782 | 0.003452 | SREBF2 | SREBF2 |
| chr1:11986032:G/A:1 | Old | chr1 | 11986032 | rs873458 | G | A | -0.24204 | 0.082797 | 0.003464 | MFN2 | MFN2 |
| chr3:12353506:T/A:1 | Old | chr3 | 12353506 | rs4135246 | T | A | 0.60759 | 0.208506 | 0.003568 | PPARG | PPARG |
| chr11:112098766:T/A:1 | Old | chr11 | 1.12E+08 | rs73570104 | T | A | -0.76081 | 0.261451 | 0.003615 | SDHD, ENSG00000255292 | SDHD |
| chr14:102930369:C/G:1 | Old | chr14 | 1.03E+08 | rs148815688 | C | G | -0.25894 | 0.089222 | 0.003706 | AMN | AMN |
| chr2:227697183:T/C:1 | Old | chr2 | 2.28E+08 | rs111588325 | T | C | -0.81657 | 0.28212 | 0.003799 | SLC19A3 | SLC19A3 |
| chr3:193691422:G/A:1 | Old | chr3 | 1.94E+08 | rs150260623 | G | A | 1.1405 | 0.397466 | 0.004112 | OPA1 | OPA1 |
| chr5:7852294:G/T:1 | Old | chr5 | 7852294 | rs79931532 | G | T | -0.61376 | 0.214017 | 0.004133 | MTRR | MTRR |
| chr12:53632567:G/A:1 | Old | chr12 | 53632567 | rs115845101 | G | A | 0.70933 | 0.247567 | 0.004167 |  | ATP5MC2 |
| chr1:52014633:T/A:1 | Old | chr1 | 52014633 | rs78191534 | T | A | 1.1196 | 0.39299 | 0.004387 |  | TXNDC12 |
| chr11:68789442:G/T:1 | Old | chr11 | 68789442 | rs11228354 | G | T | 0.32886 | 0.115663 | 0.004466 | CPT1A | CPT1A |
| chr12:32666246:T/G:1 | Old | chr12 | 32666246 | rs10844279 | T | G | 0.30969 | 0.109434 | 0.004656 |  | DNM1L |
| chr8:144361856:T/C:1 | Old | chr8 | 1.44E+08 | rs7837817 | T | C | 0.93874 | 0.333329 | 0.004859 |  | SLC52A2 |
| chr20:6017012:G/A:1 | Old | chr20 | 6017012 | rs118008730 | G | A | 0.72882 | 0.260341 | 0.005118 | ENSG00000286235, CRLS1 | CRLS1 |
| chr21:45515247:C/T:1 | Old | chr21 | 45515247 | rs12106284 | C | T | -1.258 | 0.452928 | 0.005478 | SLC19A1 | SLC19A1 |
| chr6:161250792:T/C:1 | Old | chr6 | 1.61E+08 | rs73019323 | T | C | 0.3848 | 0.139538 | 0.005822 | AGPAT4 | AGPAT4 |
| chr10:17133485:A/C:1 | Old | chr10 | 17133485 | rs10904883 | A | C | 0.23507 | 0.086065 | 0.006309 |  | CUBN |
| chr10:131967106:T/C:1 | Old | chr10 | 1.32E+08 | rs10870307 | T | C | 0.2367 | 0.086695 | 0.006329 | BNIP3 | BNIP3 |
| chr22:46241548:A/G:1 | Old | chr22 | 46241548 | rs11538240 | A | G | 1.0213 | 0.374845 | 0.006438 | PPARA | PPARA |
| chr7:148997847:G/A:1 | Old | chr7 | 1.49E+08 | rs716817 | G | A | -0.22806 | 0.084175 | 0.006741 |  | PDIA4 |
| chr6:75231976:A/G:1 | Old | chr6 | 75231976 | rs118122414 | A | G | 0.6601 | 0.245326 | 0.00713 |  | COX7A2 |
| chr1:53210185:C/T:1 | Old | chr1 | 53210185 | rs2229292 | C | T | 0.90879 | 0.337892 | 0.007154 | CPT2, ENSG00000236723 | CPT2 |
| chr11:89324180:G/A:1 | Old | chr11 | 89324180 | rs3829229 | G | A | 0.23674 | 0.088025 | 0.007157 |  | NOX4 |
| chr22:39500082:C/A:1 | Old | chr22 | 39500082 | rs61588697 | C | A | -1.0974 | 0.408043 | 0.007157 | MIEF1 | MIEF1 |
| chr3:126800607:C/T:1 | Old | chr3 | 1.27E+08 | rs116268342 | C | T | 0.56135 | 0.209245 | 0.007302 | CHCHD6 | CHCHD6 |
| chr7:92509110:A/G:1 | Old | chr7 | 92509110 | rs11767684 | A | G | 0.22554 | 0.08516 | 0.008087 | ENSG00000244055, PEX1 | PEX1 |
| chr16:21971214:A/G:1 | Old | chr16 | 21971214 | rs2037287 | A | G | 0.34451 | 0.130322 | 0.008205 | UQCRC2 | UQCRC2 |
| chr2:86168150:T/C:1 | Old | chr2 | 86168150 | rs1424516 | T | C | 0.39111 | 0.1489 | 0.008622 | IMMT | IMMT |
| chr7:108512460:T/C:1 | Old | chr7 | 1.09E+08 | rs138386507 | T | C | 0.65532 | 0.250128 | 0.008795 | PNPLA8 | PNPLA8 |
| chr9:104898153:T/G:1 | Old | chr9 | 1.05E+08 | rs114489744 | T | G | 1.1089 | 0.423553 | 0.008842 | ABCA1 | ABCA1 |
| chr22:38212013:A/G:1 | Old | chr22 | 38212013 | rs4510313 | A | G | 0.66461 | 0.254012 | 0.008885 | PLA2G6, MAFF | PLA2G6 |
| chr1:17053454:G/A:1 | Old | chr1 | 17053454 | rs6665176 | G | A | 1.1312 | 0.434688 | 0.009259 | SDHB | SDHB |
| chr12:4650928:C/T:1 | Old | chr12 | 4650928 | rs112133437 | C | T | -1.1781 | 0.453868 | 0.00944 | ENSG00000272921, NDUFA9, ENSG00000255639 | NDUFA9 |
| chr7:150984122:C/T:1 | Old | chr7 | 1.51E+08 | rs2373961 | C | T | -0.22856 | 0.088077 | 0.009459 |  | NOS3 |
| chr17:18259948:C/T:1 | Old | chr17 | 18259948 | rs28364628 | C | T | -0.2537 | 0.098322 | 0.009871 | MIEF2 | MIEF2 |
| chr7:87384004:C/T:1 | Old | chr7 | 87384004 | rs73394196 | C | T | -1.61 | 0.630075 | 0.010611 | CROT | CROT |
| chr18:50923676:C/T:1 | Old | chr18 | 50923676 | rs2511038 | C | T | 0.37527 | 0.147122 | 0.010749 | ME2 | ME2 |
| chr7:80399551:T/C:1 | Old | chr7 | 80399551 | rs6975303 | T | C | 0.87291 | 0.34596 | 0.011631 | CD36 | CD36 |
| chr2:239937903:C/T:1 | Old | chr2 | 2.4E+08 | rs74771290 | C | T | 0.73072 | 0.290057 | 0.011761 | NDUFA10 | NDUFA10 |
| chr8:26458398:C/T:1 | Old | chr8 | 26458398 | rs227982 | C | T | 0.24695 | 0.0981 | 0.011825 | BNIP3L | BNIP3L |
| chr5:43790748:C/T:1 | Old | chr5 | 43790748 | rs113997997 | C | T | 0.46238 | 0.184521 | 0.012216 |  | NNT |
| chr21:43951007:A/G:1 | Old | chr21 | 43951007 | rs2838447 | A | G | -0.20156 | 0.080683 | 0.012483 | AGPAT3, ENSG00000288593 | AGPAT3 |
| chr2:97654421:T/C:1 | Old | chr2 | 97654421 | rs1375436 | T | C | -0.21336 | 0.08593 | 0.01303 |  | COX5B |
| chr5:234868:A/G:1 | Old | chr5 | 234868 | rs140519744 | A | G | 0.47957 | 0.193177 | 0.013045 | SDHA, ENSG00000286001 | SDHA |
| chr1:55053079:C/T:1 | Old | chr1 | 55053079 | rs7552841 | C | T | -0.21238 | 0.085637 | 0.013139 | PCSK9 | PCSK9 |
| chr8:99881380:G/C:1 | Old | chr8 | 99881380 | rs114323040 | G | C | 0.95699 | 0.386065 | 0.013181 | COX6C | COX6C |
| chr9:136677762:G/A:1 | Old | chr9 | 1.37E+08 | rs11788475 | G | A | 0.60878 | 0.246026 | 0.013344 | AGPAT2 | AGPAT2 |
| chr22:19933614:C/T:1 | Old | chr22 | 19933614 | rs9605030 | C | T | 0.28476 | 0.115328 | 0.013544 | TXNRD2 | TXNRD2 |
| chr9:19156260:T/C:1 | Old | chr9 | 19156260 | rs10964008 | T | C | -0.26908 | 0.109628 | 0.014109 |  | PLIN2 |
| chr5:131950375:G/A:1 | Old | chr5 | 1.32E+08 | rs114993497 | G | A | 0.65455 | 0.266923 | 0.014198 | ENSG00000281938, ENSG00000234758,ACSL6 | ACSL6 |
| chr1:161869975:G/A:1 | Old | chr1 | 1.62E+08 | rs10399867 | G | A | 0.30203 | 0.123183 | 0.014211 | ATF6 | ATF6 |
| chr17:27767570:C/T:1 | Old | chr17 | 27767570 | rs28944169 | C | T | -0.74229 | 0.303127 | 0.014335 | NOS2 | NOS2 |
| chr16:87879587:G/T:1 | Old | chr16 | 87879587 | rs556425143 | G | T | 0.72726 | 0.297083 | 0.014365 |  | SLC7A5 |
| chr9:78296318:A/G:1 | Old | chr9 | 78296318 | rs17725890 | A | G | 0.20659 | 0.085229 | 0.015353 |  | PSAT1 |
| chr8:30702098:C/T:1 | Old | chr8 | 30702098 | rs8190975 | C | T | -1.2529 | 0.518711 | 0.015717 | GSR | GSR |
| chr17:64108404:C/T:1 | Old | chr17 | 64108404 | rs1874087 | C | T | 0.20229 | 0.083807 | 0.015788 | ERN1 | ERN1 |
| chr1:161364164:G/A:1 | Old | chr1 | 1.61E+08 | rs115718047 | G | A | 1.0298 | 0.429318 | 0.016454 |  | SDHC |
| chr17:5060034:G/T:1 | Old | chr17 | 5060034 | rs12325828 | G | T | -0.21097 | 0.088208 | 0.016769 |  | SLC52A1 |
| chr22:35382872:G/A:1 | Old | chr22 | 35382872 | rs17881147 | G | A | 0.86165 | 0.363572 | 0.017791 | HMOX1 | HMOX1 |
| chr12:103940119:C/G:1 | Old | chr12 | 1.04E+08 | rs1165686 | C | G | -0.79875 | 0.338535 | 0.018303 | HSP90B1 | HSP90B1 |
| chr12:57518773:T/C:1 | Old | chr12 | 57518773 | rs703836 | T | C | -0.27564 | 0.117166 | 0.018645 | DDIT3, ENSG00000285133 | DDIT3 |
| chr14:61716708:T/C:1 | Old | chr14 | 61716708 | rs17834635 | T | C | -0.51913 | 0.221731 | 0.019219 | ENSG00000258667, HIF1A | HIF1A |
| chr14:73572650:T/C:1 | Old | chr14 | 73572650 | rs1266315987 | T | C | -0.77401 | 0.33104 | 0.019381 | ENSG00000258603, ACOT2 | ACOT2 |
| chr14:81455897:C/G:1 | Old | chr14 | 81455897 | rs28575930 | C | G | -1.4831 | 0.637652 | 0.020025 |  | SEL1L |
| chr1:46325005:C/T:1 | Old | chr1 | 46325005 | rs115349513 | C | T | 0.58914 | 0.25402 | 0.020381 |  | UQCRH |
| chr17:75960910:G/A:1 | Old | chr17 | 75960910 | rs35863579 | G | A | 0.25139 | 0.1089 | 0.020975 | ACOX1 | ACOX1 |
| chr19:51352957:C/T:1 | Old | chr19 | 51352957 | rs138326547 | C | T | 0.55843 | 0.242024 | 0.021036 | ETFB, ENSG00000267984, ENSG00000269403 | ETFB |
| chr4:8392149:G/A:1 | Old | chr4 | 8392149 | rs112971453 | G | A | 1.0258 | 0.445638 | 0.021343 | ACOX3 | ACOX3 |
| chr9:134389021:G/A:1 | Old | chr9 | 1.34E+08 | rs116115469 | G | A | -1.4701 | 0.644421 | 0.022532 | RXRA | RXRA |
| chr14:67366969:G/C:1 | Old | chr14 | 67366969 | rs7157676 | G | C | -0.537 | 0.236463 | 0.023148 | EIF2S1 | EIF2S1 |
| chr7:97837433:G/A:1 | Old | chr7 | 97837433 | rs117738766 | G | A | 0.68371 | 0.301915 | 0.023538 |  | ASNS |
| chr7:101250834:C/T:1 | Old | chr7 | 1.01E+08 | rs147010614 | C | T | 0.64972 | 0.290846 | 0.02549 | FIS1 | FIS1 |
| chr20:58379001:C/A:1 | Old | chr20 | 58379001 | rs75885759 | C | A | -2.1068 | 0.950398 | 0.026641 |  | VAPB |
| chr1:25992073:T/C:1 | Old | chr1 | 25992073 | rs6598938 | T | C | -0.18565 | 0.084019 | 0.027131 | PAFAH2 | PAFAH2 |
| chr10:112394994:G/A:1 | Old | chr10 | 1.12E+08 | rs146605626 | G | A | 0.53976 | 0.244556 | 0.027307 | ACSL5 | ACSL5 |
| chr19:17506024:T/C:1 | Old | chr19 | 17506024 | rs9137 | T | C | 0.26798 | 0.121652 | 0.027605 | SLC27A1, PGLS-DT | SLC27A1 |
| chr1:119648473:G/A:1 | Old | chr1 | 1.2E+08 | rs191626925 | G | A | 0.96468 | 0.440889 | 0.028668 | ENSG00000301166, PHGDH | PHGDH |
| chr6:159681678:C/T:1 | Old | chr6 | 1.6E+08 | rs5746141 | C | T | 0.38478 | 0.177156 | 0.029857 | SOD2 | SOD2 |
| chr16:85801212:G/A:1 | Old | chr16 | 85801212 | rs11557187 | G | A | 0.3266 | 0.150417 | 0.02991 | COX4I1 | COX4I1 |
| chr2:222877984:A/T:1 | Old | chr2 | 2.23E+08 | rs16864206 | A | T | -1.1415 | 0.526065 | 0.030016 | ACSL3 | ACSL3 |
| chr12:56640910:A/G:1 | Old | chr12 | 56640910 | rs9634277 | A | G | -0.18324 | 0.084522 | 0.030163 | ATP5F1B | ATP5F1B |
| chr4:158683465:A/G:1 | Old | chr4 | 1.59E+08 | rs7661426 | A | G | 0.79845 | 0.368396 | 0.030206 | ETFDH | ETFDH |
| chr1:19618849:T/C:1 | Old | chr1 | 19618849 | rs189512748 | T | C | 0.65039 | 0.300204 | 0.030274 | MICOS10, NBL1, MICOS10-NBL1 | MICOS10 |
| chr20:35128876:T/C:1 | Old | chr20 | 35128876 | rs114380788 | T | C | 0.77487 | 0.36405 | 0.033299 | EDEM2 | EDEM2 |
| chr12:7215503:A/G:1 | Old | chr12 | 7215503 | rs140272193 | A | G | -0.49417 | 0.232217 | 0.033334 | PEX5 | PEX5 |
| chr22:30633795:A/G:1 | Old | chr22 | 30633795 | rs143563809 | A | G | 0.82034 | 0.387786 | 0.034393 |  | TCN2 |
| chr11:47576929:G/A:1 | Old | chr11 | 47576929 | rs144915398 | G | A | 0.60922 | 0.288135 | 0.034485 | NDUFS3, KBTBD4 | NDUFS3 |
| chr7:132819320:T/C:1 | Old | chr7 | 1.33E+08 | rs6942938 | T | C | -0.1768 | 0.083658 | 0.03457 | CHCHD3 | CHCHD3 |
| chr2:88661430:C/T:1 | Old | chr2 | 88661430 | rs111606055 | C | T | 0.66484 | 0.31873 | 0.036986 | EIF2AK3, ENSG00000302514, ENSG00000302526 | EIF2AK3 |
| chr1:161197775:C/T:1 | Old | chr1 | 1.61E+08 | rs114458094 | C | T | -2.0045 | 0.966364 | 0.038054 | ADAMTS4, NDUFS2 | NDUFS2 |
| chr3:48903390:G/A:1 | Old | chr3 | 48903390 | rs142633447 | G | A | 0.42227 | 0.204408 | 0.038845 |  | SLC25A20 |
| chr19:42409427:T/C:1 | Old | chr19 | 42409427 | rs34366776 | T | C | -0.81934 | 0.399811 | 0.040431 | LIPE-AS1, LIPE | LIPE |
| chr11:68032117:C/T:1 | Old | chr11 | 68032117 | rs117961226 | C | T | -0.68995 | 0.33789 | 0.041158 | NDUFS8 | NDUFS8 |
| chr15:74924247:T/C:1 | Old | chr15 | 74924247 | rs145640653 | T | C | -0.85649 | 0.420106 | 0.041474 | COX5A | COX5A |
| chr6:35377791:G/A:1 | Old | chr6 | 35377791 | rs76690650 | G | A | -0.51818 | 0.254638 | 0.041854 | PPARD, ENSG00000297330 | PPARD |
| chr6:33198770:C/T:1 | Old | chr6 | 33198770 | rs9469379 | C | T | 0.3544 | 0.175405 | 0.043335 | RXRB | RXRB |
| chr15:90083863:G/A:1 | Old | chr15 | 90083863 | rs76066237 | G | A | 0.76858 | 0.385322 | 0.046081 | IDH2 | IDH2 |
| chr1:11792841:G/C:1 | Old | chr1 | 11792841 | rs45525835 | G | C | 0.46693 | 0.234334 | 0.046307 | MTHFR | MTHFR |
| chr2:21041862:T/C:1 | Old | chr2 | 21041862 | rs12720841 | T | C | -0.93006 | 0.469249 | 0.047477 | APOB | APOB |
| chr3:179394565:G/A:1 | Old | chr3 | 1.79E+08 | rs13059852 | G | A | 0.18818 | 0.095469 | 0.048711 | MFN1 | MFN1 |
| chr1:193108518:T/C:1 | Old | chr1 | 1.93E+08 | rs10801176 | T | C | -0.21087 | 0.107059 | 0.048877 |  | GLRX2 |
| chr5:43680842:G/A:1 | Young | chr5 | 43680842 | rs74657028 | G | A | 1.0038 | 0.236657 | 2.22E-05 | NNT | NNT |
| chr12:94960474:A/T:1 | Young | chr12 | 94960474 | rs9788213 | A | T | 0.51794 | 0.129916 | 6.7E-05 | NDUFA12 | NDUFA12 |
| chr5:179730776:A/C:1 | Young | chr5 | 1.8E+08 | rs41285555 | A | C | -2.8781 | 0.794613 | 0.000292 | CANX | CANX |
| chr12:103939218:G/T:1 | Young | chr12 | 1.04E+08 | rs151307201 | G | T | 1.1861 | 0.346036 | 0.000609 | HSP90B1 | HSP90B1 |
| chr1:19522556:C/T:1 | Young | chr1 | 19522556 | rs11589372 | C | T | -0.34254 | 0.104576 | 0.001055 | MICOS10, ENSG00000306287 | MICOS10 |
| chr21:42233951:G/T:1 | Young | chr21 | 42233951 | rs9984192 | G | T | 0.60835 | 0.185787 | 0.001059 | ABCG1 | ABCG1 |
| chr6:53608243:G/A:1 | Young | chr6 | 53608243 | rs489584 | G | A | 0.51311 | 0.161928 | 0.001531 | GCLC, KILH | GCLC |
| chr1:119714487:T/C:1 | Young | chr1 | 1.2E+08 | rs637868 | T | C | -0.33152 | 0.104632 | 0.001533 | PHGDH | PHGDH |
| chr3:185262207:G/C:1 | Young | chr3 | 1.85E+08 | rs147145800 | G | C | 1.4369 | 0.45373 | 0.001541 | EHHADH | EHHADH |
| chr4:184826777:C/T:1 | Young | chr4 | 1.85E+08 | rs55713639 | C | T | -0.48556 | 0.155235 | 0.001761 | ACSL1, ENSG00000286256 | ACSL1 |
| chr15:76195527:C/T:1 | Young | chr15 | 76195527 | rs75738171 | C | T | 1.274 | 0.414226 | 0.002101 | TMEM266, ETFA | ETFA |
| chr1:11980715:C/T:1 | Young | chr1 | 11980715 | rs115036878 | C | T | -2.6102 | 0.852902 | 0.002211 | MFN2 | MFN2 |
| chr1:161771828:T/C:1 | Young | chr1 | 1.62E+08 | rs12083229 | T | C | 0.7886 | 0.261215 | 0.002536 | ATF6 | ATF6 |
| chr6:35396757:G/C:1 | Young | chr6 | 35396757 | rs9658111 | G | C | -0.6129 | 0.204773 | 0.002762 | PPARD | PPARD |
| chr14:81476585:G/C:1 | Young | chr14 | 81476585 | rs17094188 | G | C | -1.2187 | 0.410667 | 0.003001 | SEL1L | SEL1L |
| chr3:12295862:C/T:1 | Young | chr3 | 12295862 | rs75570295 | C | T | -1.8117 | 0.611782 | 0.003063 | PPARG | PPARG |
| chr4:8421447:G/A:1 | Young | chr4 | 8421447 | rs2688229 | G | A | 0.31452 | 0.106344 | 0.003101 | ACOX3 | ACOX3 |
| chr1:75784965:A/G:1 | Young | chr1 | 75784965 | rs148853449 | A | G | 1.3283 | 0.453084 | 0.003371 | ACADM | ACADM |
| chr17:64079070:A/G:1 | Young | chr17 | 64079070 | rs76959113 | A | G | 0.95218 | 0.325158 | 0.003408 | ERN1 | ERN1 |
| chr9:104801322:T/C:1 | Young | chr9 | 1.05E+08 | rs2245793 | T | C | -0.46621 | 0.160747 | 0.003728 | ABCA1 | ABCA1 |
| chr7:108545567:T/G:1 | Young | chr7 | 1.09E+08 | rs17155891 | T | G | 0.81494 | 0.281059 | 0.003737 | PNPLA8 | PNPLA8 |
| chr12:39577475:T/A:1 | Young | chr12 | 39577475 | rs11172675 | T | A | 0.47575 | 0.16518 | 0.003974 | ABCD2 | ABCD2 |
| chr12:4657632:T/C:1 | Young | chr12 | 4657632 | rs6489557 | T | C | 1.4497 | 0.505097 | 0.004103 | ENSG00000272921, NDUFA9, ENSG00000255639 | NDUFA9 |
| chr7:97854528:T/C:1 | Young | chr7 | 97854528 | rs76174078 | T | C | -2.507 | 0.884839 | 0.004607 | ASNS, ENSG00000284707 | ASNS |
| chr9:134344175:A/G:1 | Young | chr9 | 1.34E+08 | rs147013100 | A | G | 0.89033 | 0.318528 | 0.005188 | RXRA | RXRA |
| chr22:19893798:G/A:1 | Young | chr22 | 19893798 | rs56312415 | G | A | 0.67344 | 0.242256 | 0.005438 | TXNRD2 | TXNRD2 |
| chr8:99891833:G/A:1 | Young | chr8 | 99891833 | rs78095945 | G | A | 0.68117 | 0.245631 | 0.005552 | COX6C | COX6C |
| chr17:5049639:A/G:1 | Young | chr17 | 5049639 | rs389855 | A | G | -0.36512 | 0.132149 | 0.005729 | SLC52A1 | SLC52A1 |
| chr5:79072671:G/A:1 | Young | chr5 | 79072671 | rs9293763 | G | A | -0.72489 | 0.262975 | 0.005842 | DMGDH, BHMT2 | BHMT2 |
| chr11:68842569:T/C:1 | Young | chr11 | 68842569 | rs112337570 | T | C | -1.0952 | 0.398415 | 0.00598 | CPT1A | CPT1A |
| chr11:47570109:G/T:1 | Young | chr11 | 47570109 | rs117309942 | G | T | 0.60022 | 0.21885 | 0.006095 | NDUFS3, PTPMT1 | NDUFS3 |
| chr9:125238840:C/T:1 | Young | chr9 | 1.25E+08 | rs430397 | C | T | 0.44128 | 0.161021 | 0.006134 | HSPA5 | HSPA5 |
| chr15:89671412:C/T:1 | Young | chr15 | 89671412 | rs192726157 | C | T | -2.4204 | 0.889144 | 0.006486 | PLIN1 | PLIN1 |
| chr21:45559605:G/A:1 | Young | chr21 | 45559605 | rs1475596 | G | A | 0.54011 | 0.199059 | 0.006661 | SLC19A1 | SLC19A1 |
| chr1:236826308:T/C:1 | Young | chr1 | 2.37E+08 | rs6660700 | T | C | -0.35437 | 0.131042 | 0.006846 | MTR | MTR |
| chr3:126881384:C/T:1 | Young | chr3 | 1.27E+08 | rs61133186 | C | T | 0.71594 | 0.264925 | 0.006884 | CHCHD6 | CHCHD6 |
| chr7:56027098:A/C:1 | Young | chr7 | 56027098 | rs147984357 | A | C | -2.4191 | 0.895582 | 0.00691 | PSPH | PSPH |
| chr7:133035795:T/C:1 | Young | chr7 | 1.33E+08 | rs117880813 | T | C | -2.4347 | 0.906635 | 0.007244 | CHCHD3, ENSG00000283041 | CHCHD3 |
| chr7:80591727:A/G:1 | Young | chr7 | 80591727 | rs117862942 | A | G | 0.972 | 0.362344 | 0.007307 | CD36 | CD36 |
| chr6:159680382:C/T:1 | Young | chr6 | 1.6E+08 | rs5746150 | C | T | -2.4004 | 0.896671 | 0.007428 | SOD2 | SOD2 |
| chr14:61724764:C/T:1 | Young | chr14 | 61724764 | rs10144011 | C | T | 0.46024 | 0.173105 | 0.007844 | ENSG00000258667, HIF1A | HIF1A |
| chr8:26392324:C/T:1 | Young | chr8 | 26392324 | rs74757596 | C | T | 0.83175 | 0.313149 | 0.007905 | BNIP3L | BNIP3L |
| chr10:16903038:T/C:1 | Young | chr10 | 16903038 | rs72771398 | T | C | 0.82388 | 0.310976 | 0.008065 | CUBN, ENSG00000296126 | CUBN |
| chr6:136822635:G/A:1 | Young | chr6 | 1.37E+08 | rs115866467 | G | A | 0.94651 | 0.358008 | 0.008198 | PEX7 | PEX7 |
| chr1:11797519:T/C:1 | Young | chr1 | 11797519 | rs45577533 | T | C | 0.54232 | 0.205258 | 0.008239 | MTHFR | MTHFR |
| chr6:161207628:G/A:1 | Young | chr6 | 1.61E+08 | rs74797747 | G | A | -0.72687 | 0.275351 | 0.008296 | AGPAT4 | AGPAT4 |
| chr22:30616769:T/C:1 | Young | chr22 | 30616769 | rs4820885 | T | C | 0.27992 | 0.106928 | 0.008849 | TCN2 | TCN2 |
| chr20:35133040:C/T:1 | Young | chr20 | 35133040 | rs73903015 | C | T | 0.90388 | 0.345463 | 0.008885 | EDEM2 | EDEM2 |
| chr22:41891186:C/T:1 | Young | chr22 | 41891186 | rs56702546 | C | T | 0.81453 | 0.314275 | 0.009548 | SREBF2 | SREBF2 |
| chr2:26192558:G/A:1 | Young | chr2 | 26192558 | rs13429249 | G | A | 1.0679 | 0.413155 | 0.009745 | HADHA | HADHA |
| chr9:19125157:A/G:1 | Young | chr9 | 19125157 | rs73417223 | A | G | 1.1093 | 0.431275 | 0.010107 | PLIN2 | PLIN2 |
| chr1:161208940:G/A:1 | Young | chr1 | 1.61E+08 | rs75018347 | G | A | 1.0823 | 0.42096 | 0.01014 | NDUFS2 | NDUFS2 |
| chr5:241245:G/A:1 | Young | chr5 | 241245 | rs138655867 | G | A | 1.221 | 0.477088 | 0.010489 | SDHA, ENSG00000286001 | SDHA |
| chr6:75237910:G/A:1 | Young | chr6 | 75237910 | rs75996601 | G | A | 0.71923 | 0.282038 | 0.010769 | COX7A2 | COX7A2 |
| chr22:46173274:G/A:1 | Young | chr22 | 46173274 | rs4253655 | G | A | 0.36393 | 0.142969 | 0.010912 | PPARA | PPARA |
| chr2:175181687:G/A:1 | Young | chr2 | 1.75E+08 | rs268228 | G | A | 0.3313 | 0.130194 | 0.010938 | ATP5MC3 | ATP5MC3 |
| chr18:50922816:T/C:1 | Young | chr18 | 50922816 | rs633145 | T | C | 1.0966 | 0.431679 | 0.011075 | ME2 | ME2 |
| chr17:27771612:G/A:1 | Young | chr17 | 27771612 | rs28999409 | G | A | -1.1575 | 0.45574 | 0.011091 | NOS2 | NOS2 |
| chr1:211817200:A/G:1 | Young | chr1 | 2.12E+08 | rs6540709 | A | G | -0.29034 | 0.114596 | 0.01129 | LPGAT1 | LPGAT1 |
| chr2:239936025:C/T:1 | Young | chr2 | 2.4E+08 | rs78791266 | C | T | 1.014 | 0.402254 | 0.011709 | NDUFA10 | NDUFA10 |
| chr20:6021391:C/T:1 | Young | chr20 | 6021391 | rs2143636 | C | T | -0.90623 | 0.359601 | 0.011732 | ENSG00000286235, CRLS1 | CRLS1 |
| chr11:89497433:A/T:1 | Young | chr11 | 89497433 | rs511774 | A | T | 0.4669 | 0.185594 | 0.011879 | NOX4 | NOX4 |
| chr8:144346186:T/C:1 | Young | chr8 | 1.44E+08 | rs56056790 | T | C | 0.26034 | 0.103598 | 0.011972 | SLC52A2 | SLC52A2 |
| chr3:179392524:T/G:1 | Young | chr3 | 1.79E+08 | rs2287210 | T | G | 1.1449 | 0.455669 | 0.011986 | MFN1 | MFN1 |
| chr1:20646420:C/T:1 | Young | chr1 | 20646420 | rs567701989 | C | T | 0.90413 | 0.359886 | 0.011996 | PINK1, PINK1-AS | PINK1 |
| chr1:53203282:G/A:1 | Young | chr1 | 53203282 | rs59327204 | G | A | -1.0646 | 0.423821 | 0.012008 | CPT2 | CPT2 |
| chr3:193607518:G/C:1 | Young | chr3 | 1.94E+08 | rs144538292 | G | C | 1.102 | 0.438918 | 0.012049 | OPA1 | OPA1 |
| chr16:87857738:C/G:1 | Young | chr16 | 87857738 | rs116337335 | C | G | 0.48745 | 0.195694 | 0.012743 | SLC7A5, ENSG00000305326 | SLC7A5 |
| chr11:116792959:G/A:1 | Young | chr11 | 1.17E+08 | rs1729411 | G | A | 0.38871 | 0.156134 | 0.012788 | APOA5 | APOA5 |
| chr4:138190181:T/C:1 | Young | chr4 | 1.38E+08 | rs116686111 | T | C | 0.74407 | 0.299384 | 0.012943 | SLC7A11 | SLC7A11 |
| chr11:64321744:C/G:1 | Young | chr11 | 64321744 | rs1047206 | C | G | -0.40066 | 0.161633 | 0.013182 | PRDX5 | PRDX5 |
| chr1:165412607:T/C:1 | Young | chr1 | 1.65E+08 | rs10489745 | T | C | 0.39476 | 0.159313 | 0.013217 | ENSG00000298458, RXRG | RXRG |
| chr19:51353350:C/T:1 | Young | chr19 | 51353350 | rs111522316 | C | T | 0.38252 | 0.15758 | 0.015205 | ETFB, ENSG00000269403 | ETFB |
| chr1:52046799:C/T:1 | Young | chr1 | 52046799 | rs2992179 | C | T | 0.58421 | 0.240873 | 0.015292 | TXNDC12 | TXNDC12 |
| chr9:78324492:C/T:1 | Young | chr9 | 78324492 | rs72745651 | C | T | -1.5199 | 0.627726 | 0.015466 | PSAT1 | PSAT1 |
| chr1:55046876:T/C:1 | Young | chr1 | 55046876 | rs499718 | T | C | -0.29377 | 0.121707 | 0.015789 | PCSK9 | PCSK9 |
| chr3:5189114:A/G:1 | Young | chr3 | 5189114 | rs76190140 | A | G | -1.2426 | 0.515748 | 0.015982 | EDEM1 | EDEM1 |
| chr11:822622:A/G:1 | Young | chr11 | 822622 | rs7942159 | A | G | 0.25359 | 0.105289 | 0.016018 | PNPLA2 | PNPLA2 |
| chr2:44424402:C/T:1 | Young | chr2 | 44424402 | rs1067373 | C | T | 0.46855 | 0.196338 | 0.017013 | CAMKMT | CAMKMT |
| chr18:9948330:T/C:1 | Young | chr18 | 9948330 | rs29127 | T | C | -0.29376 | 0.123747 | 0.017603 | VAPA | VAPA |
| chr21:43955293:G/A:1 | Young | chr21 | 43955293 | rs733085 | G | A | -0.73596 | 0.312716 | 0.018601 | AGPAT3, ENSG00000288593 | AGPAT3 |
| chr11:86571836:C/T:1 | Young | chr11 | 86571836 | rs11234696 | C | T | 0.27709 | 0.118123 | 0.018987 | ENSG00000254733, ME3 | ME3 |
| chr10:133362754:G/A:1 | Young | chr10 | 1.33E+08 | rs1050040 | G | A | 0.65057 | 0.277753 | 0.019167 | ECHS1 | ECHS1 |
| chr17:75976265:G/A:1 | Young | chr17 | 75976265 | rs73997680 | G | A | 0.97199 | 0.415437 | 0.0193 | ACOX1 | ACOX1 |
| chr22:36474572:C/T:1 | Young | chr22 | 36474572 | rs9619607 | C | T | -0.58909 | 0.252973 | 0.019876 | TXN2 | TXN2 |
| chr16:56936291:A/G:1 | Young | chr16 | 56936291 | rs8044804 | A | G | -0.2813 | 0.120815 | 0.019894 | HERPUD1 | HERPUD1 |
| chr17:18261283:G/A:1 | Young | chr17 | 18261283 | rs115052842 | G | A | -2.1913 | 0.943982 | 0.020269 | MIEF2 | MIEF2 |
| chr22:38127821:G/A:1 | Young | chr22 | 38127821 | rs11570702 | G | A | 0.80667 | 0.351468 | 0.021725 | PLA2G6 | PLA2G6 |
| chr5:7879919:C/G:1 | Young | chr5 | 7879919 | rs75356060 | C | G | -1.4597 | 0.637102 | 0.021954 | MTRR | MTRR |
| chr19:17474332:T/C:1 | Young | chr19 | 17474332 | rs78334009 | T | C | -0.76033 | 0.33397 | 0.022807 | SLC27A1 | SLC27A1 |
| chr12:120438262:A/C:1 | Young | chr12 | 1.2E+08 | rs116850387 | A | C | -0.65896 | 0.290282 | 0.023203 | COX6A1, ENSG00000111780 | COX6A1 |
| chr11:116836474:G/A:1 | Young | chr11 | 1.17E+08 | rs5076 | G | A | 0.4374 | 0.194764 | 0.024717 | APOA1, APOA1-AS | APOA1 |
| chr17:17818053:G/C:1 | Young | chr17 | 17818053 | rs556637207 | G | C | 0.84147 | 0.376219 | 0.02531 | SREBF1 | SREBF1 |
| chr6:33198003:G/C:1 | Young | chr6 | 33198003 | rs17847933 | G | C | 0.40739 | 0.183651 | 0.026536 | RXRB | RXRB |
| chr9:136680856:G/A:1 | Young | chr9 | 1.37E+08 | rs142856052 | G | A | 0.96251 | 0.435302 | 0.027028 | AGPAT2 | AGPAT2 |
| chr10:119169426:C/T:1 | Young | chr10 | 1.19E+08 | rs2271362 | C | T | 0.24528 | 0.112135 | 0.028715 | PRDX3 | PRDX3 |
| chr12:32737744:T/C:1 | Young | chr12 | 32737744 | rs59000311 | T | C | 0.3174 | 0.145599 | 0.029262 | DNM1L, YARS2 | DNM1L |
| chr2:227714175:T/C:1 | Young | chr2 | 2.28E+08 | rs17372407 | T | C | 0.29224 | 0.134182 | 0.029412 | SLC19A3 | SLC19A3 |
| chr19:11107685:G/A:1 | Young | chr19 | 11107685 | rs140898392 | G | A | 0.47586 | 0.220547 | 0.030956 | LDLR | LDLR |
| chr22:43982103:A/C:1 | Young | chr22 | 43982103 | rs111661035 | A | C | 0.64881 | 0.301939 | 0.03165 | SAMM50 | SAMM50 |
| chr8:30710764:A/T:1 | Young | chr8 | 30710764 | rs765932525 | A | T | 0.42168 | 0.196477 | 0.031856 | GSR | GSR |
| chr6:42964123:G/A:1 | Young | chr6 | 42964123 | rs1051218 | G | A | 0.56001 | 0.262341 | 0.032789 | PEX6 | PEX6 |
| chr2:206116562:G/A:1 | Young | chr2 | 2.06E+08 | rs111364412 | G | A | 0.36263 | 0.170726 | 0.033666 | NDUFS1, ENSG00000231955 | NDUFS1 |
| chr18:9114098:T/G:1 | Young | chr18 | 9114098 | rs1039825 | T | G | -0.28626 | 0.134964 | 0.033921 | NDUFV2, ENSG00000265257, ENSG00000263847 | NDUFV2 |
| chr1:25978205:A/T:1 | Young | chr1 | 25978205 | rs3767928 | A | T | 0.23368 | 0.110609 | 0.034629 | PAFAH2 | PAFAH2 |
| chr16:21969390:C/T:1 | Young | chr16 | 21969390 | rs35235259 | C | T | -0.45737 | 0.21686 | 0.034939 | UQCRC2 | UQCRC2 |
| chr2:222915734:A/G:1 | Young | chr2 | 2.23E+08 | rs115003272 | A | G | 1.0048 | 0.477013 | 0.035166 | ACSL3 | ACSL3 |
| chr1:169484465:C/T:1 | Young | chr1 | 1.69E+08 | rs72706084 | C | T | -0.40682 | 0.193393 | 0.035413 | SLC19A2 | SLC19A2 |
| chr2:21040767:T/G:1 | Young | chr2 | 21040767 | rs531819 | T | G | -0.27482 | 0.131012 | 0.035934 | APOB | APOB |
| chr2:86178574:C/T:1 | Young | chr2 | 86178574 | rs139555237 | C | T | 0.7124 | 0.340538 | 0.036439 | IMMT | IMMT |
| chr10:7804606:C/T:1 | Young | chr10 | 7804606 | rs1244433 | C | T | 1.1369 | 0.553179 | 0.039858 | ATP5F1C, ENSG00000305746 | ATP5F1C |
| chr19:42404961:C/T:1 | Young | chr19 | 42404961 | rs7254853 | C | T | -1.3415 | 0.656959 | 0.041154 | LIPE-AS1, LIPE | LIPE |
| chr1:193100739:C/T:1 | Young | chr1 | 1.93E+08 | rs35358794 | C | T | 0.59231 | 0.290852 | 0.041705 | GLRX2 | GLRX2 |
| chr19:10489863:C/T:1 | Young | chr19 | 10489863 | rs113881345 | C | T | 0.83364 | 0.41145 | 0.042754 | KEAP1 | KEAP1 |
| chr5:132001827:G/A:1 | Young | chr5 | 1.32E+08 | rs75213695 | G | A | 0.83512 | 0.412467 | 0.042899 | ENSG00000281938, ACSL6 | ACSL6 |
| chr9:128355002:G/A:1 | Young | chr9 | 1.28E+08 | rs78484772 | G | A | 0.69005 | 0.340862 | 0.042927 | SLC27A4 | SLC27A4 |
| chr7:149028509:G/A:1 | Young | chr7 | 1.49E+08 | rs11546289 | G | A | -0.26075 | 0.129665 | 0.044331 | PDIA4 | PDIA4 |
| chr2:88677638:C/T:1 | Young | chr2 | 88677638 | rs13397939 | C | T | 0.41025 | 0.205069 | 0.045442 | EIF2AK3, ENSG00000302526 | EIF2AK3 |
| chr19:4530822:T/A:1 | Young | chr19 | 4530822 | rs10413600 | T | A | -0.21415 | 0.107219 | 0.045791 | PLIN5, ENSG00000267385 | PLIN5 |
| chr15:74928181:T/C:1 | Young | chr15 | 74928181 | rs57437866 | T | C | -0.43929 | 0.220916 | 0.046756 | COX5A | COX5A |
| chr1:17051777:T/C:1 | Young | chr1 | 17051777 | rs59413250 | T | C | 0.88626 | 0.44727 | 0.047538 | SDHB | SDHB |
| chr10:112415020:C/G:1 | Young | chr10 | 1.12E+08 | rs77799504 | C | G | 0.64307 | 0.32494 | 0.047811 | ACSL5, ENSG00000232934 | ACSL5 |

Each row represents the top nominally associated variant (*p* < 0.05) for a target gene within each age stratum from the age-stratified male infertility GWAS. Analyses were performed separately in young men aged 20-40 years (*n* = 28,823) and older men aged ≥55 years (*n* = 66,892) using Firth logistic regression adjusted for age and the first ten genetic principal components. Reported values include chromosome, position, rsID, reference and alternate alleles, beta, standard error, *p*-value, overlapping gene annotation, and matched target gene(s). The table is collapsed to the top signal per target gene and age stratum.

**Cohort selection and stratification from the All of Us Research Program**
To investigate population-level associations with male infertility, we leveraged the All of Us Research Program and implemented a systematic cohort selection pipeline to generate a well-defined analytic dataset. From an initial pool of 633,248 participants aged ≥18 years at consent, we applied sequential inclusion criteria to ensure availability of both genomic and clinical data. Participants younger than 20 years at the time of consent were excluded, along with individuals lacking short-read whole-genome sequencing (srWGS) data or linked electronic health record (EHR) data. Additional exclusions were applied to remove participants with missing or incomplete demographic information, including those who skipped or declined responses for assigned sex at birth or selected categories outside the scope of this analysis. Following these filtering steps, a final analytic cohort of 121,064 participants was established.

Within this cohort, 995 individuals were identified as cases of male infertility based on diagnostic codes, while 120,069 participants served as controls. To enable age-dependent analyses, we further stratified the cohort into “young” (20–40 years) and “old” (≥55 years) groups. Participants aged 41–54 years were excluded from this subset analysis to minimize overlap between age groups and enhance contrast between early and late reproductive stages. This stratification yielded 412 male infertility cases and 28,411 controls in the young cohort, and 254 cases and 66,638 controls in the older cohort. These well-powered, age-defined groups enabled downstream analyses of phenotype associations and laboratory signatures across the lifespan.

**Phenome-wide association analysis reveals systemic comorbidities linked to male infertility across age groups**

To define the broader clinical landscape associated with male infertility, we performed a phenome-wide association study (PheWAS) across the All of Us cohort, stratified by age. This analysis enabled the identification of disease phenotypes enriched in individuals with male infertility and revealed both shared and age-specific patterns of association. Across both age groups, reproductive phenotypes—including azoospermia, oligospermia, erectile dysfunction, and abnormal spermatogenesis—emerged as among the most significantly associated conditions, validating the analytical framework. These associations were particularly pronounced in the older cohort, where infertility-related phenotypes exhibited stronger statistical enrichment and higher effect sizes, consistent with increased prevalence and severity of reproductive dysfunction with age.

Beyond reproductive traits, male infertility was associated with a wide range of systemic comorbidities. In younger individuals, significant associations were observed with vascular and dermatologic conditions, including varicose veins and disorders of the circulatory system, as well as inflammatory-related phenotypes. These findings suggest that early manifestations of infertility may be linked to vascular and inflammatory dysfunction, potentially reflecting underlying mitochondrial stress responses.
In contrast, the older cohort demonstrated a broader and more pronounced spectrum of associated conditions spanning multiple organ systems. These included musculoskeletal disorders such as osteoarthritis, respiratory conditions including sleep apnea and upper respiratory diseases, and neoplastic phenotypes such as secondary malignant neoplasms and lymphomas. The increased burden and diversity of associated phenotypes in older individuals indicate that infertility in this population is embedded within a context of systemic physiological decline.

Notably, several phenotypes related to metabolic and structural dysfunction—including testicular hypofunction and abnormalities in reproductive organ development—were consistently observed across age groups, suggesting shared underlying mechanisms. The convergence of reproductive, metabolic, and systemic disease signatures supports a model in which male infertility reflects broader disruptions in cellular homeostasis rather than a tissue-restricted defect. Importantly, the distribution and magnitude of these associations align with our experimental findings of mitochondrial dysfunction. The enrichment of vascular, inflammatory, and metabolic disorders is consistent with impaired mitochondrial bioenergetics and increased oxidative stress, processes that are central to both sperm function and systemic disease pathogenesis. The stronger and more diverse associations observed in older individuals further support a progressive model in which mitochondrial dysfunction accumulates over time, leading to widespread physiological consequences. Together, these results demonstrate that male infertility is associated with a multi-system disease network that expands with age. This phenome-wide landscape provides population-level evidence linking reproductive dysfunction to systemic health and reinforces the concept that mitochondrial integrity serves as a unifying axis underlying both fertility and broader disease susceptibility.

**Lab-wide association analysis identifies age-dependent metabolic and inflammatory signatures linked to male infertility**

To further define the clinical signatures associated with male infertility, we performed a lab-wide association study (LabWAS) across the All of Us cohort, stratified by age. This approach enabled systematic evaluation of circulating biomarkers and clinical laboratory values associated with infertility-related phenotypes. In the younger cohort, significant associations were primarily observed within hematologic and inflammatory markers. Notably, platelet mean volume, red cell distribution width (RDW), band neutrophil percentage, and myelocyte counts were elevated in cases compared to controls. These findings suggest that early manifestations of male infertility are associated with subtle alterations in immune and hematopoietic function, consistent with low-grade systemic stress or inflammation. Additional associations with cardiac-related markers, including troponin T, further point to early systemic perturbations that extend beyond the reproductive axis.

In contrast, the older cohort exhibited a markedly different and more pronounced laboratory signature, characterized by significant alterations in metabolic and organ function markers. Among the most significant associations were increased glucose levels, altered CO₂ concentrations, and changes in albumin, indicating disruptions in metabolic homeostasis and systemic physiology. Additional markers, including red blood cell indices, hematocrit, hemoglobin, and brain natriuretic peptide (BNP), further suggest broader involvement of cardiovascular and metabolic systems in individuals with infertility. Importantly, the magnitude and significance of these associations were greater in the older cohort, consistent with a progressive model in which early, subtle changes in inflammatory pathways evolve into widespread metabolic dysfunction with age. This shift from immune-dominated signatures in younger individuals to metabolic and organ-level dysregulation in older individuals highlights a temporal progression in the systemic manifestations of infertility.

These findings strongly align with the mitochondrial mechanisms identified in our experimental analyses. Mitochondrial dysfunction, particularly impaired oxidative phosphorylation and increased reactive oxygen species (ROS) production, is known to influence both inflammatory signaling and metabolic regulation. The enrichment of hematologic and inflammatory markers in younger individuals is consistent with early mitochondrial stress responses, whereas the metabolic abnormalities observed in older individuals reflect downstream consequences of sustained mitochondrial dysfunction. Together, the LabWAS analysis reveals that male infertility is associated with distinct, age-dependent systemic biomarker profiles. These data provide population-level evidence linking mitochondrial dysfunction to both early inflammatory changes and later-stage metabolic decline, reinforcing the concept that infertility represents a multi-system condition rooted in impaired cellular bioenergetics.
